# Supplementary material
Source: PubMed Central journal article supplement (PMC516559)
Supplement: pnas_101_36_13273__3.pdf [file pnas_101_36_13273__3.pdf]

```

GGTGCTGTTGACAAATCATTGGATTGCCCGTTGGGTGCTCGGCATCCTGGAAAGGATGGCTCTCGTTATCGGAATGATAA 80
TTAATCAGCCACGGTCAATCAACTTCTGGATGAAGTCCGACTTCTCTCCACCATCTCTCACAATCACGCGTTCCAATAA 160
TCAATCCAGCACCTGCACAAGAGCAGATTTACCCGGAATCTATCGGCACCCCACATGTGGTGGAGGGTTAATGACAATCA 240
TTCTGCATTATACGACGAGATGGCGCAACCAATCGCGAATAGTCTTTGGAAAGAAGGCGCAAAAGTTAAACTGGTCTCA 320
      Signal peptide
AGTAAAAGATGGACTCGCTTTTGTGGAAGGCTACAATCATATTGGCGTGCATTCAAGGTACTTCTCAGACGTCCACTAAG 400
      M D S L L L K A T I I L A C I O G T S O T S T K
      >
      Intron 1 ^
      K N K N K S K I C V L K S I V G V T N E E A S L F C N
      AAAACAATAAGTCAAAGATTTGTGTTTGAATCAATTGTTGGTGAACAAATGAAGAGGCCAGCTTGTGTTTGCAG 480
      Y S T N L K K T V I S L L K V N G S T E M D T F S T
      CTATTCCACAAACTTGAAAAAACAGTAATCAGTTTGCTGAAAGTCAATGGATCAACGGAGATGGACACATTCTCTACAA 560
      N Y T I K I G S S G R F K L A R D R K S G R A S I I I
      ATTATACCATTAAAATTGGTTCCAGTGGCCGCTTTAAGCTGGCTAGAGATAGGAAATCAGGACGGGCTTCGATTATAATA 640
      K O L R Y S D N G I Y F C E V O E D H N K L T A P G G
      AAACACTTCGGTATTCGACAATGGAATATACTTTTGTGAGGTTTCAGGAAGATCATAACAACTAACAGCACCCGGAGG 720
      T O L T V E G A P E V K O L A R S N S K G I V D L T
      AACACAACCTTACAGTGGGAGGTGCTCCAGAGGTTAAACAACCTCGCAAGAAGTAACTCAAAGGGATCGTGGATCTCACCA 800
      Intron 2 ^
      K L I C K V E G V P T P N I T W I V P D G F P M P L N
      AATGATTTGCAAAGTGGAGGGGGTGCACACCGAACATCAGTGGATTGTTCCGGATGGGTTCCCAATGCCTCTGAAT 880
      E T K L T S K K W F I S T C M L E H R G G L P L G T Y
      GAGACGAAGCTGACCAGCAAAAAATGGTTCATCAGCACGTGCATGCTCGAACATCGGGGGGGTTTGCCTTGGAACATA 960
      T C R A R N O Y G E A S K D I R L S V S V P R V K D
      CACCTGCAGAGCAGCAACCAGTATGGGGAGCGAGCAAAAGACATTCGGCTGTCAGTGTCCGTGCCACGTGTCAAAGACA 1040
      T L S S D S K T F K I M S S V G A I V G G A L V T M A
      CATTAAGCAGCGACAGCAAAACCTTCAAGATAATGTGAGTGTGGAGCCATTGTCCGGTGGTGCCTCGTTACGATGGCG 1120
      A V I F I R H K R O R S I S D V S A G V A T F E T T A
      GCTGTCATCTTCATACGTCACAAAAGGCCAAAGGAGCATCTCCGATGTTTCTGCTGGCGTAGCAACATTCGAGACTACAGC 1200
      Intron 3 ^
      O D A E N V V Y A T L S H D T S A T K A T P P C H D
      TCAAGATGCGGAGAACGTGGTGTATGCCACCTTGAGCCACGACACATCGGCCACAAAAGCCACTCCACCTTGCCACGAGC 1280
      Intron 5
      D A V V Y A S I L N H *
      ATGCTGTTGTGTATGCAAGCATCTGAACCACTAGGGCTTGTCAAACAAGACATCCGAAAATGTTTCATCAAGCATCCATG 1360
      GCATTAAGATGTGCGAAAACCTAAGATCTGCTCATTCCGGTTCGACTCGTCAATCCAAAGACTAGACCCTGTGTTCTATGG 1440
      GAGACGGAGATTTTTTTTTCAGTCACGCTTTGTGTGGAATCCCATTCCTTTGTCCATTATGGATTCTGCGTCTGTTACATT 1520
      AAAAAAGACACATCTTAAACTCACCTAATTGTACTATTGGCTTTCCCGGTAACCTTATATTGGAACATCTATTTTTGTT 1600
      GTCTGATTGGATTATTCTGTAATTATTATAATTCAGTGAATCATAGTTTGTTCATTTTATTGAAATTCGAGAGGAGTC 1680
      ATTGATATTGTTAAAATAAGCTTTCTTTTCACTTAGATATTATCTAAACTTGTGCGTGTAGCTATTTGT 1750

```

Signal peptide

GAAACATTGTA AAAATCCAAAATGGCTGGAGCCATGAGGTCCAGCGAGACGGTGGTGTTCATTGCGCTGGTGGTGGTTACCG 80  
Intron 1 ^

IgV

G V H L H O P A G E T H S V W L P C R S H A I H O Y S  
GGGTCCACCTGCACCAGCCCGCTGGAGAGACTCACAGTGTCTGGCTACCGTGTAGAAGCCATGCCATTCAATATTTCA 160  
Intron 2 ^

V S W Y F T N D O H K F N V L Y O T S S S S A S V H S  
GTGTCCTGGTATTTTACAAATGACCAACACAAATTCAACGTGTTGTACCAACAAGCAGCAGCAGTGCCTGTGTGCATTCT 240  
L F T N R A S V P E R A F E T G N F S L L L S S A K  
TCTATTCACAAAACAGGGCATCCGTGCCAGAGCGTGCATTGAAACCGGCAACTTTTCGCTGTTGCTCTCATCGGCTAAGT 320

Intron 3 ^

F E D A G R Y T C Y V N R K F T C E V A L L A S K V T  
TTGAAGATGCGGGAGATATACTTGCTATGTGAACAGAAAATTTACTTGTGAAGTTGCTTTGTTGGCCAGCAAAGTCAAC 400

IgC

T R A K N P V R V G S T I T L I C E I S T K P R G I I  
ACCAGGGCAAAAACCCGTGTCGGTGTGGGCTCCACCATCACTTTGATCTGTGAAATATCCACAAAGCCACGTGGAATTAT 480  
Y S R N R D G G V Y W Y H D G T V O S S M T K R S N R  
TTACTCCAGGAATCGTGATGGCGVTTTATTGGTATCATGATGGAACCGTTTCAGTCCATGCCAAGAGAAGCAACCGGT 560  
F T C L K H N T G S W T C K P R N R G N A E I A Y F E  
TCACGTGTCTCAAACACAACACGGGCTCTTGACCTGTAAACCTCGCAACAGAGGCAACGCAGAAATCGCATATTTTGA 640

Intron 4 ^

H Y L D V S D P P M T M N T P V D A S I W K T T H E V  
CATTACCTTGACGTGTCCGATCCACCAATGACCATGAATACACCCGTTGATGCAAGCATCTGGAAAACGACACACGAGGT 720

Transmembrane

P S I S T A P V S S S S L F T S P P S S S S T P P  
TCCGTCCATCAGCAGGCTCCCGTCTCCTCCTCGCTCTTCACTTCCCCTCCAGCAGCAGCAGCAGCAGCAGCAGCAGC 800

Cytoplasmic

V S S Y P D S A A T G T V S A A L V A A A V A L L S I  
TCTCCTCCTACCCGACTCCGCAGCCACCGGACTGTGTCCGCTGCCTTGGTGGCCGCGGCGGTGGCCCTCCTCTCGATC 880

Intron 5 ^

A L L A A L G T A C F F L R R T R A A R L A R A H O L  
GCCCTGCTCGCGCGCTGGGGACCGCATGCTTCTTCTTACGCCGACGCGAGCGGCACGGCTGGCACGTGCCATCAGCT 960

O A V K A P V H L C P G A N H P P P K C S R P S S H  
ACAGGCGGTCAAGGCACCAGTTCATCTGTGTCCGGGAGCCAATCACCCACCTCCGAAATGTTCCAGGCCCTCGTCAATC 1040

P S I Y S S C E S T P W S C V R R G O E T E R L P A R  
CAAGCATCTACAGCAGCTGCGAGTCCACGCCATGGAGTTGCGTACGCAGAGGTGAGGAGACTGAAAGGCTGCCGGCACGA 1120  
^ Intron 6

W O H R R R L R O O R P R E T \*  
TGGAACACAGACGCCGTTTACGACAACAACGACCCCGTGGAGCTAGAGATGACGATGTCTCCAGTGACTATGATGTTT 1200  
GTGTGGACTCTTACGATTCACCTAGTCCAGAAGGCACGCTGGGTTCATCATCAGCAGCAGCCCGGCACAATGTATGCTGTG 1280  
GTGCTGCAGCACTGCATCAGACAAGAGGCAGACTTACACCTCTACGATGCGGCCATGTGAGAAGGTGCCGACTGATATGA 1360  
AGCACGTGAGACTCAGTGCAGTGTGCCAGAGGAGTCAAACAATTTCTTCTGATTACATCTACAAAATAATAAACTTGACT 1440  
CTTT 1444
